# Supplementary material for: Cancer cell adaptation to hypoxia involves a HIF‐GPRC5A‐YAP axis
Source: PubMed Central journal article supplement (PMC6220329; doi:10.15252/emmm.201708699), 2018-08-24
Supplement: EMMM-10-e8699-s001.pdf [file EMMM-10-e8699-s001.pdf]

## **Cancer cell adaptation to hypoxia involves a HIF-GPRC5A-YAP axis**

Alexander Greenhough, Clare Bagley, Kate J. Heesom, David B. Gurevich, David Gay, Mark Bond, Tracey J. Collard, Chris Paraskeva, Paul Martin, Owen J. Sansom, Karim Malik & Ann C. Williams

### **Appendix**

Appendix Table S1

Appendix Table S2

Appendix Table S3

Appendix Table S4

**Appendix Table S1.**

**Proteins upregulated by hypoxia >1.3-fold by SILAC proteomics**

| <b>Protein</b>                                                                                                      | <b>Gene name [Uniprot ID]</b>    | <b>Av. fold change (hyp/norm)</b> |
|---------------------------------------------------------------------------------------------------------------------|----------------------------------|-----------------------------------|
| Protein CIP2A OS= GN=KIAA1524 PE=1 SV=2 - [CIP2A_]                                                                  | CIP2A [Q8TCG1]                   | 9.937175                          |
| FLJ58410, to Solute carrier family 2, facilitated glucosetransporter member 3 (SLC2A3)                              | FLJ58410 [SLC2A3]                | 9.523694                          |
| FLJ58285, topre-B-cell leukemia transcription factor interacting protein 1 (PBXIP1)                                 | FLJ58285 [PBXIP1]                | 6.882701                          |
| Tyrosine-protein kinase Fyn OS= GN=FYN PE=2 SV=1 - [B3KPS6_]                                                        | FYN [B3KPS6]                     | 6.424762                          |
| Syntaxin-5 (Fragment) OS= GN=STX5 PE=4 SV=1 - [H7C3X5_]                                                             | STX5 [H7C3X5]                    | 5.98948                           |
| FLJ76596, topreimplantation protein 3 (PREI3), transcript variant 2, mRNA OS= PE=2 SV=1 - [A8K012_]                 | PREI3 [A8K012]                   | 5.845809                          |
| FLJ51483, to Multiple inositol polyphosphate phosphatase 1 (EC 3.1.3.62) OS= PE=2 SV=1 - [B4E394_]                  | FLJ51483 [B4E394_]               | 5.839956                          |
| FLJ54709, to Methylcrotonoyl-CoA carboxylase subunit alpha, mitochondrial (EC 6.4.1.4)                              | FLJ54709 [Q96RQ3]                | 5.731391                          |
| FLJ39243 fis, clone OCBBF2008283,to Protein NDRG1 OS= PE=2 SV=1 - [B3KU62_]                                         | FLJ39243 NDRG1 [B3KU62]          | 5.648131                          |
| Uncharacterized protein C2orf47, mitochondrial OS= GN=C2orf47 PE=1 SV=1 - [CB047_]                                  | C2orf47 [CB047]                  | 5.418898                          |
| Glycolipid transfer protein (Fragment) OS= GN=GLTP PE=4 SV=1 - [HOYFS9_]                                            | GLTP [HOYFS9]                    | 5.227555                          |
| Transcription factor MaFF OS= GN=MAFF PE=1 SV=2 - [MAFF_]                                                           | MAFF [MAFF]                      | 5.224378                          |
| Egl nine homolog 1 OS= GN=EGLN1 PE=1 SV=1 - [EGLN1_]                                                                | EGLN1 [EGLN1]                    | 5.128501                          |
| Tubulin-specific chaperone C OS= GN=TBCC PE=1 SV=2 - [TBCC_]                                                        | TBCC [TBCC]                      | 4.730313                          |
| FADD protein (Fragment) OS= GN=FADD PE=2 SV=1 - [Q6LCB0_]                                                           | FADD [Q6LCB0]                    | 4.551731                          |
| FLJ61359, to Adapter-relatedprotein complex 2 alpha- 2 subunit OS= PE=2 SV=1 - [B7Z5S9_]                            | FLJ61359 [B7Z5S9]                | 4.408787                          |
| Adducin 3 isoform a variant (Fragment) OS= PE=2 SV=1 - [Q59EK1_]                                                    | [Q59EK1]                         | 4.124374                          |
| Pleckstrin homology domain-containing family A member 2 OS= GN=PLEKHA2 PE=4 SV=1 - [F5GZK0_]                        | PLEKHA2 [F5GZK0]                 | 4.109901                          |
| Cytochrome b-c1 complex subunit 7 OS= GN=UOQCRB PE=1 SV=2 - [QCR7_]                                                 | UOQCRB [QCR7]                    | 4.102806                          |
| ATP synthase mitochondrial F1 complex assembly factor 2 OS= GN=ATPAF2 PE=1 SV=1 - [ATPF2_]                          | ATPAF2 [ATPF2]                   | 4.086017                          |
| Importin subunit alpha-4 OS= GN=KPNA4 PE=1 SV=1 - [IMA4_]                                                           | KPNA4 [IMA4]                     | 4.03096                           |
| FLJ92928,to retinitis pigmentosa 2 (X-linked recessive) (RP2), mRNA OS= PE=2 SV=1 - [B2R6F5_]                       | FLJ92928 [B2R6F5]                | 3.896465                          |
| Interferon-induced transmembrane protein 2 (Fragment) OS= GN=IFITM2 PE=4 SV=1 - [H7BYV1_]                           | IFITM2 [H7BYV1]                  | 3.832501                          |
| 39S ribosomal protein L16, mitochondrial OS= GN=MRPL16 PE=1 SV=1 - [RM16_]                                          | MRPL16 [RM16]                    | 3.800119                          |
| Small intestine SPAK-like kinase OS= PE=2 SV=1 - [Q6E0B2_]                                                          | [Q6E0B2]                         | 3.777222                          |
| DnaJ homolog subfamily C member 3 OS= GN=DNAJC3 PE=1 SV=1 - [DNJC3_]                                                | DNAJC3 [DNJC3]                   | 3.739799                          |
| Peptidyl-tRNA hydrolase ICT1, mitochondrial (Fragment) OS= GN=ICT1 PE=4 SV=1 - [J3KS15_]                            | ICT1 [J3KS15]                    | 3.686984                          |
| Protein jagunal homolog 1 OS= GN=JAGN1 PE=1 SV=1 - [JAGN1_]                                                         | JAGN1 [JAGN1]                    | 3.66049                           |
| ATP-dependent RNA helicase DHX29 OS= GN=DHX29 PE=1 SV=2 - [DHX29_]                                                  | DHX29 [DHX29]                    | 3.606886                          |
| Procollagen-lysine,2-oxoglutarate 5-dioxygenase 2 OS= GN=PLOD2 PE=4 SV=1 - [E7ETU9_]                                | PLOD2 [E7ETU9]                   | 3.573237                          |
| FLJ77742, tointegrin, alpha 5 (fibronectin receptor, alpha polypeptide), mRNA OS= PE=2 SV=1 - [A8K6A5_]             | FLJ77742 [A8K6A5]                | 3.436392                          |
| Protein kinase C-binding protein 1 OS= GN=ZMYND8 PE=2 SV=1 - [B7ZM62_]                                              | ZMYND8 [B7ZM62]                  | 3.256561                          |
| Fructose-bisphosphate aldolase C OS= GN=ALDOC PE=1 SV=2 - [ALDOC_]                                                  | ALDOC [ALDOC]                    | 2.795511                          |
| Lymphoid specific helicase variant9 OS= GN=HELLS PE=2 SV=1 - [Q6I7N8_]                                              | HELLS [Q6I7N8]                   | 2.760589                          |
| Cysteine and glycine-rich protein 1 OS= GN=CSR1 PE=4 SV=1 - [E9PP21_]                                               | CSR1 [E9PP21]                    | 2.705261                          |
| Carbonic anhydrase 9 OS= GN=CA9 PE=1 SV=2 - [CAH9_]                                                                 | CA9 [CAH9]                       | 2.595861                          |
| 6-phosphofructo-2-kinase/fructose-2, 6-biphosphatase 4 splice isoform 5 OS= GN=PFKFB4 PE=2 SV=1 - [Q5XLC2_]         | PFKFB4 [Q5XLC2]                  | 2.454068                          |
| RNA demethylase ALKBH5 OS= GN=ALKBH5 PE=1 SV=2 - [ALKB5_]                                                           | ALKBH5 [ALKB5]                   | 2.330931                          |
| FLJ16785 fis, clone NT2R12015342,to Solute carrier family 2, facilitated glucose transporter member 1 OS= PE=2 SV=1 | FLJ16785 SLC2A1 [B3KVN0]         | 2.312908                          |
| Coiled-coil-helix-coiled-coil-helix domain-containing protein 2, mitochondrial OS= GN=CHCHD2 PE=1 SV=1 - [CHCH2_]   | CHCHD2 [CHCH2]                   | 2.149897                          |
| [Pyruvate dehydrogenase [lipoamide]] kinase isozyme 1, mitochondrial OS= GN=PDK1 PE=2 SV=1 - [B7Z7N6_]              | PDK1 [B7Z7N6]                    | 2.147474                          |
| Metallo-beta-lactamase domain-containing protein 2 OS= GN=MBLAC2 PE=1 SV=3 - [MBLC2_]                               | MBLAC2 [MBLC2]                   | 2.114094                          |
| P4HA2 protein OS= GN=P4HA2 PE=2 SV=1 - [Q05DA4_]                                                                    | P4HA2 [Q05DA4]                   | 2.082993                          |
| , FLJ96656, to SPFH domain family, member 1 (SPFH1), mRNA OS= PE=2 SV=1 - [B2RDK6_]                                 | SPFH1 [B2RDK6]                   | 2.036835                          |
| Cellular retinoic acid binding protein 2 (Fragment) OS= GN=CRABP2 PE=2 SV=1 - [Q5SYZ4_]                             | CRABP2 [Q5SYZ4]                  | 1.942341                          |
| FLJ52712, to Tubulin beta-6 chain OS= PE=2 SV=1 - [B4DP54_]                                                         | FLJ52712 [B4DP54_]               | 1.927083                          |
| E-Cad/CTF3 OS= GN=CDH1 PE=4 SV=1 - [H3BVI7_]                                                                        | CDH1 [H3BVI7]                    | 1.915548                          |
| Neuroserpin OS= GN=SERPINI1 PE=3 SV=1 - [C9J6F7_]                                                                   | SERPINI1 [C9J6F7]                | 1.859225                          |
| Prolyl 4-hydroxylase subunit alpha-1 OS= GN=P4HA1 PE=1 SV=2 - [P4HA1_]                                              | P4HA1 [P4HA1]                    | 1.836002                          |
| F-box/LRR-repeat protein 8 OS= GN=FBXL8 PE=1 SV=1 - [FBXL8_]                                                        | FBXL8 [FBXL8]                    | 1.7352                            |
| Phosphoglycerate kinase 1 OS= GN=PGK1 PE=1 SV=3 - [PGK1_]                                                           | PGK1 [PGK1]                      | 1.713839                          |
| PDZ and LIM domain protein 4 OS= GN=PDLIM4 PE=1 SV=2 - [PDLI4_]                                                     | PDLIM4 [PDLI4]                   | 1.694211                          |
| MUC1 isoform M11 OS= GN=MUC1 PE=2 SV=1 - [A6ZIE5_]                                                                  | MUC1 [A6ZIE5]                    | 1.66769                           |
| Iron-responsive element binding protein 2, isoform CRA_a OS= GN=IREB2 PE=4 SV=1 - [D3DW85_]                         | IREB2 [D3DW85]                   | 1.651273                          |
| [Pyruvate dehydrogenase [lipoamide]] kinase isozyme 3, mitochondrial OS= GN=PDK3 PE=1 SV=1 - [PDK3_]                | PDK3 [PDK3]                      | 1.648721                          |
| Protein FAM162A OS= GN=FAM162A PE=4 SV=1 - [F8W7Q4_]                                                                | FAM162A [F8W7Q4]                 | 1.643937                          |
| 2-methoxy-6-polyprenyl-1,4-benzoquinol methylase, mitochondrial (Fragment) OS= GN=COQ5 PE=4 SV=1 - [F8VWX6_]        | COQ5 [F8VWX6]                    | 1.64317                           |
| Keratin, type II cytoskeletal 80 OS= GN=KRT80 PE=1 SV=2 - [K2C80_]                                                  | KRT80 [K2C80]                    | 1.631964                          |
| Thymidylate synthase OS= GN=TS PE=2 SV=1 - [Q8WYK3_]                                                                | TS [Q8WYK3]                      | 1.619454                          |
| Retinoic acid-induced protein 3 (Fragment) OS= GN=GPRC5A PE=4 SV=1 - [F5GWG3_]                                      | GPRC5A [F5GWG3]                  | 1.617928                          |
| BRI3-binding protein OS= GN=BRI3BP PE=1 SV=1 - [BRI3B_]                                                             | BRI3BP [BRI3B]                   | 1.564127                          |
| EF-hand domain-containing protein D2 OS= GN=EFHD2 PE=1 SV=1 - [EFHD2_]                                              | EFHD2 [EFHD2]                    | 1.544446                          |
| Ribonucleoside-diphosphate reductase subunit M2 (Fragment) OS= GN=RRM2 PE=4 SV=1 - [C9JXC1_]                        | RRM2 [C9JXC1]                    | 1.535526                          |
| JARID1C protein OS= GN=JARID1C PE=2 SV=1 - [A6N6J7_]                                                                | JARID1C [A6N6J7]                 | 1.528685                          |
| Ephrin-B1 OS= GN=EFNB1 PE=1 SV=1 - [EFNB1_]                                                                         | EFNB1 [EFNB1]                    | 1.515968                          |
| Hexokinase-2 OS= GN=HK2 PE=3 SV=1 - [E9PB90_]                                                                       | HK2 [E9PB90]                     | 1.509546                          |
| Protein S100-A10 OS= GN=S100A10 PE=1 SV=2 - [S10AA_]                                                                | S100A10 [S10AA]                  | 1.505843                          |
| Methylsterol monooxygenase 1 OS= GN=MSMO1 PE=1 SV=1 - [MSMO1_]                                                      | MSMO1 [MSMO1]                    | 1.488818                          |
| Adenylate kinase isoenzyme 4, mitochondrial OS= GN=AK4 PE=1 SV=1 - [KAD4_]                                          | AK4 [KAD4]                       | 1.476758                          |
| Dolichol-phosphate mannosyltransferase subunit 3 OS= GN=DPM3 PE=1 SV=2 - [DPM3_]                                    | DPM3 [DPM3]                      | 1.466608                          |
| FLJ53831, to FK506-binding protein 9 (EC 5.2.1.8) OS= PE=2 SV=1 - [B7Z1U8_]                                         | FLJ53831 [B7Z1U8]                | 1.461006                          |
| FLJ76881, toglycogen synthase 1 (muscle) (GYS1), mRNA OS= PE=2 SV=1 - [A8K6K7_]                                     | FLJ76881 GYS1 [A8K6K7]           | 1.457569                          |
| Acyl-coenzyme A oxidase OS= PE=2 SV=1 - [B4DU07_]                                                                   | Acyl-coenzyme A oxidase [B4DU07] | 1.450854                          |
| Cytosolic 5'-nucleotidase 3 OS= GN=NT5C3 PE=1 SV=3 - [5NT3_]                                                        | NT5C3 [5NT3]                     | 1.433691                          |
| Enolase OS= GN=ENO2 PE=2 SV=1 - [B7Z2X9_]                                                                           | ENO2 [B7Z2X9]                    | 1.432793                          |
| Putative Golgi pH regulator C (Fragment) OS= GN=GPR89C PE=4 SV=1 - [HOYFP4_]                                        | GPR89C [HOYFP4]                  | 1.421682                          |
| Leucine-rich repeat and death domain-containing protein 1 OS= GN=LRRD1 PE=2 SV=2 - [LRRD1_]                         | LRRD1 [LRRD1]                    | 1.414377                          |
| Chromosome 6 open reading frame 150 OS= GN=C6orf150 PE=4 SV=1 - [A6PW79_]                                           | C6orf150 [A6PW79_]               | 1.409133                          |
| Retinoic acid early transcript 1H (Fragment) OS= GN=RAET1H PE=4 SV=1 - [J7HBC9_]                                    | RAET1H [J7HBC9]                  | 1.40526                           |
| Keratin, type I cytoskeletal 19 OS= GN=KRT19 PE=1 SV=4 - [K1C19_]                                                   | KRT19 [K1C19]                    | 1.40006                           |
| Fructose-bisphosphate aldolase A OS= GN=ALDOA PE=1 SV=2 - [ALDOA_]                                                  | ALDOA [ALDOA]                    | 1.384885                          |
| Niban-like protein 1 OS= GN=FAM129B PE=1 SV=3 - [NIBL1_]                                                            | FAM129B [NIBL1]                  | 1.376295                          |
| ERO1-like protein alpha OS= GN=ERO1L PE=1 SV=2 - [ERO1A_]                                                           | ERO1L [ERO1A]                    | 1.368026                          |
| Similar to cytoskeleton-associated protein 4 (Fragment) OS= PE=2 SV=1 - [Q8TB01_]                                   | [Q8TB01]                         | 1.36028                           |
| Acyl-coenzyme A oxidase OS= PE=2 SV=1 - [B2R856_]                                                                   | [B2R856]                         | 1.359386                          |
| N-chimaerin (Fragment) OS= GN=CHN1 PE=4 SV=1 - [C9J3G1_]                                                            | CHN1 [C9J3G1]                    | 1.341558                          |
| Monocarboxylate transporter 4 OS= GN=SLC16A3 PE=1 SV=1 - [MOT4_]                                                    | SLC16A3 [MOT4]                   | 1.334075                          |
| Peroxisomal membrane protein PMP34 OS= GN=SLC25A17 PE=3 SV=1 - [B0QYW5_]                                            | SLC25A17 [B0QYW5]                | 1.327424                          |
| AGPAT2 protein (Fragment) OS= GN=AGPAT2 PE=2 SV=1 - [Q96IS9_]                                                       | AGPAT2 [Q96IS9]                  | 1.326865                          |
| L-lactate dehydrogenase A chain OS= GN=LDHA PE=1 SV=2 - [LDHA_]                                                     | LDHA [LDHA]                      | 1.311662                          |
| Serine/arginine-rich splicing factor 9 OS= GN=SRSF9 PE=1 SV=1 - [SRSF9_]                                            | SRSF9 [SRSF9]                    | 1.306569                          |
| Heterochromatin protein 1-binding protein 3 OS= GN=HP1BP3 PE=1 SV=1 - [HP1B3_]                                      | HP1BP3 [HP1B3]                   | 1.302614                          |
| GDH/6PGL endoplasmic bifunctional protein OS= GN=H6PD PE=1 SV=2 - [G6PE_]                                           | H6PD [G6PE]                      | 1.302455                          |
| FLJ39235 fis, clone OCBBF2007829,to Mus musculus fatso protein OS= PE=2 SV=1 - [B3KU60_]                            | FLJ39235 [B3KU60]                | 1.300593                          |

**Appendix Table S2.**

**R2: KEGG Pathway analysis**

Using dataset ps\_avgpres\_gse24551geot333\_huex10t  
 tumor\_stage=3 140 of 333 samples, transform\_2log, PresCalls>=1  
 Sourcegene=GPRC5A(3405587)

| Group                                                | In_Set | Total | %      | p-value  |
|------------------------------------------------------|--------|-------|--------|----------|
| Hippo_signaling_pathway                              | 92     | 123   | 74.80% | 1.10E-04 |
| Endocytosis                                          | 131    | 184   | 71.20% | 1.90E-04 |
| Adherens_junction                                    | 50     | 62    | 80.60% | 2.40E-04 |
| Hepatitis_B                                          | 80     | 108   | 74.10% | 5.30E-04 |
| Ubiquitin_mediated_proteolysis                       | 76     | 102   | 74.50% | 5.50E-04 |
| Cell_cycle                                           | 74     | 99    | 74.70% | 5.60E-04 |
| Lysine_degradation                                   | 27     | 31    | 87.10% | 8.90E-04 |
| Aminoacyl_tRNA_biosynthesis                          | 24     | 27    | 88.90% | 1.00E-03 |
| Fatty_acid_degradation                               | 23     | 26    | 88.50% | 1.50E-03 |
| Influenza_A                                          | 86     | 120   | 71.70% | 1.80E-03 |
| Herpes_simplex_infection                             | 93     | 132   | 70.50% | 2.80E-03 |
| Glycosylphosphatidylinositol_GPI_anchor_biosynthesis | 15     | 16    | 93.80% | 3.40E-03 |
| Protein_processing_in_endoplasmic_reticulum          | 90     | 128   | 70.30% | 3.60E-03 |
| Viral_carcinogenesis                                 | 98     | 141   | 69.50% | 4.20E-03 |
| p53_signaling_pathway                                | 44     | 58    | 75.90% | 4.90E-03 |
| Sphingolipid_signaling_pathway                       | 70     | 99    | 70.70% | 8.30E-03 |
| Tuberculosis                                         | 87     | 126   | 69.00% | 9.30E-03 |
| TNF_signaling_pathway                                | 64     | 90    | 71.10% | 9.50E-03 |
| FoxO_signaling_pathway                               | 74     | 106   | 69.80% | 0.01     |
| Bladder_cancer                                       | 24     | 30    | 80.00% | 0.01     |
| TGF_beta_signaling_pathway                           | 49     | 68    | 72.10% | 0.02     |
| MicroRNAs_in_cancer                                  | 84     | 123   | 68.30% | 0.02     |
| Proteoglycans_in_cancer                              | 109    | 163   | 66.90% | 0.02     |
| Apoptosis                                            | 50     | 70    | 71.40% | 0.02     |
| Sphingolipid_metabolism                              | 27     | 35    | 77.10% | 0.02     |
| Measles                                              | 69     | 100   | 69.00% | 0.02     |
| Oocyte_meiosis                                       | 60     | 86    | 69.80% | 0.02     |
| Endometrial_cancer                                   | 28     | 37    | 75.70% | 0.03     |
| Colorectal_cancer                                    | 37     | 51    | 72.50% | 0.03     |
| Glycerolipid_metabolism                              | 37     | 51    | 72.50% | 0.03     |
| Leishmaniasis                                        | 37     | 51    | 72.50% | 0.03     |
| AMPK_signaling_pathway                               | 68     | 100   | 68.00% | 0.04     |
| Chronic_myeloid_leukemia                             | 38     | 53    | 71.70% | 0.04     |
| Epstein_Barr_virus_infection                         | 97     | 147   | 66.00% | 0.04     |
| Small_cell_lung_cancer                               | 52     | 75    | 69.30% | 0.04     |
| mRNA_surveillance_pathway                            | 43     | 61    | 70.50% | 0.04     |
| Lysosome                                             | 60     | 88    | 68.20% | 0.04     |

**R2: Gene Set Analysis**

Tumor Colon (Core-Transcript) - Sveen - 333 - rma\_sketch - huex10t  
 tumor\_stage=3 140 of 333 samples, transform\_2log, PresCalls>=1  
 Sourcegene=GPRC5A(3405587) within Hippo\_signaling\_pathway

| HUGO (Gene symbol) | r value | p value  | Pres |
|--------------------|---------|----------|------|
| CDH1               | 0.57    | 2.00E-13 | 140  |
| PAR6B              | 0.518   | 5.70E-11 | 140  |
| PPP2R1B            | 0.513   | 9.10E-11 | 140  |
| YAP1               | 0.5     | 3.30E-10 | 140  |
| CCND1              | 0.495   | 4.90E-10 | 140  |
| YWHAB              | 0.481   | 1.70E-09 | 140  |
| TP53BP2            | 0.481   | 1.80E-09 | 140  |
| TGFBR2             | 0.479   | 2.20E-09 | 140  |
| TEAD1              | 0.468   | 5.60E-09 | 140  |
| FBXW11             | 0.458   | 1.30E-08 | 140  |
| BMP8A              | 0.451   | 2.20E-08 | 134  |
| TCF7L2             | 0.449   | 2.70E-08 | 140  |
| WNT5A              | 0.422   | 2.10E-07 | 136  |
| AREG               | 0.42    | 2.40E-07 | 140  |
| DLG3               | 0.417   | 3.00E-07 | 140  |
| MOB1A              | 0.401   | 9.40E-07 | 140  |
| PPP2R2A            | 0.398   | 1.10E-06 | 140  |
| YWHAE              | 0.394   | 1.50E-06 | 140  |
| YWHAZ              | 0.39    | 2.00E-06 | 140  |
| PPP2R1A            | 0.389   | 2.10E-06 | 140  |
| LATS1              | 0.388   | 2.20E-06 | 140  |
| CTNNB1             | 0.386   | 2.50E-06 | 140  |
| BMP4               | 0.381   | 3.30E-06 | 140  |
| ACTG1              | 0.377   | 4.40E-06 | 140  |
| PPP1CA             | 0.366   | 8.60E-06 | 140  |
| MPP5               | 0.364   | 9.60E-06 | 140  |
| SERPINE1           | 0.36    | 1.30E-05 | 140  |
| TEAD4              | 0.358   | 1.40E-05 | 140  |
| FZD6               | 0.356   | 1.60E-05 | 140  |
| MYC                | 0.351   | 2.20E-05 | 140  |
| YWHAG              | 0.334   | 5.50E-05 | 140  |
| LATS2              | 0.331   | 6.60E-05 | 140  |
| SNAI2              | 0.327   | 8.20E-05 | 140  |
| TEAD3              | 0.324   | 9.50E-05 | 140  |
| BMP5               | 0.316   | 1.40E-04 | 110  |
| MOB1B              | 0.314   | 1.50E-04 | 140  |
| PPP2CB             | 0.313   | 1.70E-04 | 140  |
| INADL              | 0.311   | 1.80E-04 | 140  |
| BMP2               | 0.311   | 1.80E-04 | 112  |
| CCND3              | 0.308   | 2.10E-04 | 140  |
| LLGL2              | 0.307   | 2.30E-04 | 140  |
| AJUBA              | 0.306   | 2.40E-04 | 140  |
| WWC1               | 0.299   | 3.30E-04 | 140  |
| BIRC2              | 0.298   | 3.40E-04 | 140  |
| FZD5               | 0.297   | 3.60E-04 | 140  |
| STK3               | 0.297   | 3.60E-04 | 140  |
| BMPR2              | 0.296   | 3.80E-04 | 140  |
| RASSF6             | 0.284   | 6.70E-04 | 140  |
| PPP1CC             | 0.283   | 6.90E-04 | 140  |
| SMAD2              | 0.279   | 8.30E-04 | 140  |
| ACTB               | 0.278   | 8.80E-04 | 140  |
| NF2                | 0.277   | 9.40E-04 | 140  |
| AXIN1              | 0.272   | 1.20E-03 | 140  |
| YWHAQ              | 0.268   | 1.30E-03 | 140  |
| ID1                | 0.268   | 1.40E-03 | 136  |
| BTRC               | 0.249   | 3.00E-03 | 140  |
| BMP7               | 0.241   | 4.10E-03 | 118  |
| CTGF               | 0.239   | 4.50E-03 | 140  |
| TGFBR1             | 0.238   | 4.70E-03 | 140  |
| TCF7               | 0.235   | 5.30E-03 | 140  |
| BMPR1A             | 0.231   | 6.00E-03 | 140  |
| WNT2               | 0.216   | 0.01     | 132  |
| DVL3               | 0.216   | 0.01     | 140  |
| BMP6               | 0.213   | 0.01     | 130  |
| DLG1               | 0.211   | 0.01     | 140  |
| PRKCZ              | 0.196   | 0.02     | 140  |
| APC                | 0.195   | 0.02     | 140  |
| TGFB2              | 0.178   | 0.04     | 140  |
| WNT11              | 0.177   | 0.04     | 116  |
| TCF7L1             | 0.174   | 0.04     | 140  |
| BIRC5              | 0.169   | 0.05     | 140  |
| AMOT               | 0.166   | 0.05     | 140  |

**Appendix Table S3. List of siRNAs used in this study**

|                        |                                        |             |           |
|------------------------|----------------------------------------|-------------|-----------|
| Negative control       | ON-TARGETplus Non-targeting siRNA pool | D-001810-10 | Dharmacon |
| HIF-1 $\alpha$ siRNA 1 | ON-TARGETplus HIF1A siRNA              | J-004018-08 | Dharmacon |
| HIF-1 $\alpha$ siRNA 2 | ON-TARGETplus HIF1A siRNA              | J-004018-10 | Dharmacon |
| HIF-1 $\beta$          | SMARTpool: ON-TARGETplus HIF1B siRNA   | L-007207-00 | Dharmacon |
| YAP1 siRNA             | SMARTpool: ON-TARGETplus YAP1 siRNA    | L-012200-00 |           |
| GPRC5A siRNA pool (SP) | SMARTpool: ON-TARGETplus GPRC5A siRNA  | L-004576-00 | Dharmacon |
| GPRC5A siRNA 1         | ON-TARGETplus GPRC5A siRNA             | J-004576-08 | Dharmacon |
| GPRC5A siRNA 2         | ON-TARGETplus GPRC5A siRNA             | J-004576-07 | Dharmacon |
| GPRC5A siRNA 3         | ON-TARGETplus GPRC5A siRNA             | J-004576-06 | Dharmacon |
| HIF-2 $\alpha$ siRNA 1 | FlexiTube siRNA EPAS1_2                | S100380212  | Qiagen    |
| HIF-2 $\alpha$ siRNA 2 | FlexiTube siRNA EPAS1_4                | S100380226  | Qiagen    |
| Negative control       | Negative control RNA Duplex            | 1027310     | Qiagen    |

**Appendix Table S4. List of primers used in this study**

| <b>cDNA primers</b>                                   |                                        |                                     |
|-------------------------------------------------------|----------------------------------------|-------------------------------------|
| <b>Human</b>                                          | <b>Fwd primer 5'-3'</b>                | <b>Rev primer 5'-3'</b>             |
| GPRC5A                                                | Hs_GPRC5A_2_SG QuantiTect Primer Assay | QT01153488                          |
| CYR61                                                 | ACCGCTCTGAAGGGGATCT                    | ACTGATGTTTACAGTTGGGCTG              |
| AREG                                                  | GTCGATGATTCAGTCAGAGTTGA                | TTCAGTTATGCTATAGCATGTACAT           |
| CTGF                                                  | CAGCATGGACGTTTCGTCTG                   | AACCACGGTTTGGTCCTTGG                |
| BCL2L1                                                | CCCTTCAGAATCTTATCTTG                   | TGTAGGAGAGAAAGTCAACC                |
| <b>Mouse</b>                                          | <b>Fwd primer 5'-3'</b>                | <b>Rev primer 5'-3'</b>             |
| Gprc5a                                                | Mm_Rai3_1_SG QuantiTect Primer Assay   | QT00104832                          |
| Car9                                                  | GGTTAGAGGATCTATCGACTCCC                | GGTGCCTCCATAGCTCCAA                 |
| Egln3                                                 | AGGCAATGGTGGCTTGCTATC                  | GCGTCCCAATTCTTATTCAGGT              |
| Dll4                                                  | TTCCAGGCAACCTTCTCCGA                   | ACTGCCGCTATTCTTGTCCC                |
| <b>Zebrafish</b>                                      | <b>Fwd primer 5'-3'</b>                | <b>Rev primer 5'-3'</b>             |
| gprc5ba                                               | CAGTTCGTGGACAACCAGAG                   | AGAGCTGTCTGCCGGTGTAT                |
| gprc5bb                                               | GAGAGTCAGGCGTACACTGT                   | GCAGAGCCATTTTCAGTAGGC               |
| gprc5c                                                | CCAAGCAGAGGGTACGAGAA                   | GCCGTTATAGCCGCTGTATG                |
| cahz                                                  | TGAAGGAGCCGATCAGTGTT                   | CCATGCAGCAAGGTGTTTCT                |
| p4ha1                                                 | CGTGATGCTCAGAGGAAACG                   | AAACAGGCGGCTTTGTCTAC                |
| plod1                                                 | ACGAGGTCGTGCTGAAGTTT                   | TGCAGCCAGTCTCAAATGTC                |
| ef1a                                                  | CTTCTCAGGCTGACTGTGC                    | CCGCTAGCATTACCCTCC                  |
| <b>ChIP primers</b>                                   |                                        |                                     |
| <b>Human</b>                                          | <b>Fwd primer 5'-3'</b>                | <b>Rev primer 5'-3'</b>             |
| CA9                                                   | TCTCGTTTCCAATGCACGTACAGC               | AGTGACAGCAGCAGTTGCACAGT             |
| GPRC5A                                                | ACCCAAACACTTCCTTTGCC                   | AAGGCTCTGAACAAGGGAGT                |
| GPRC5A 8                                              | GCTGAGCTAACTACGGACCT                   | AGCCTTTCTCTCCATCACTCT               |
| <b>Cloning primers (GPRC5A si1R, AvrII and BsrGI)</b> |                                        |                                     |
| <b>Human</b>                                          | <b>Fwd primer 5'-3'</b>                | <b>Rev primer 5'-3'</b>             |
| GPRC5A si1R                                           | AAAACCTAGGATGGCTACAACAGTCCCTGATG       | AAAATGTACATTAGCTGCCCTCTTTCTTTACTTCA |
