# Supplementary material for: Cancer cell adaptation to hypoxia involves a HIF‐GPRC5A‐YAP axis
Source: PubMed Central journal article supplement (PMC6220329; doi:10.15252/emmm.201708699), 2018-08-24

## Figure 2 source data

### Figure 2A

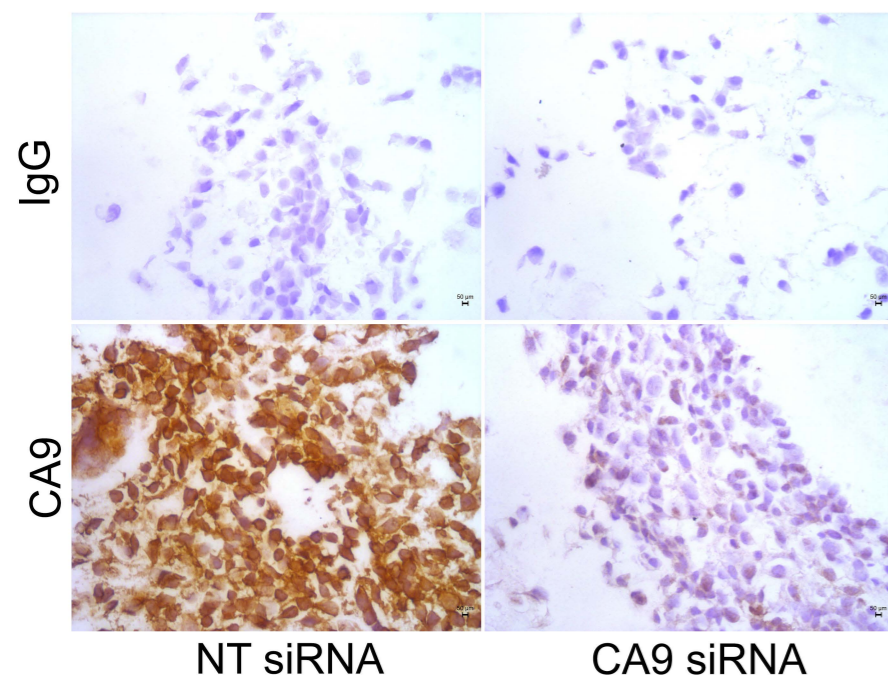

### Figure 2B

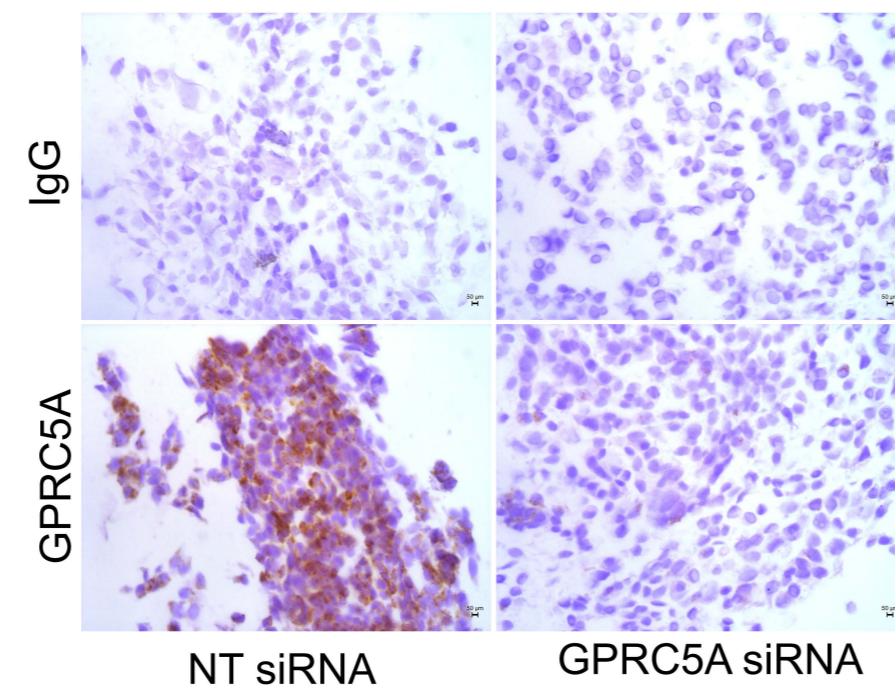

### Figure 2C

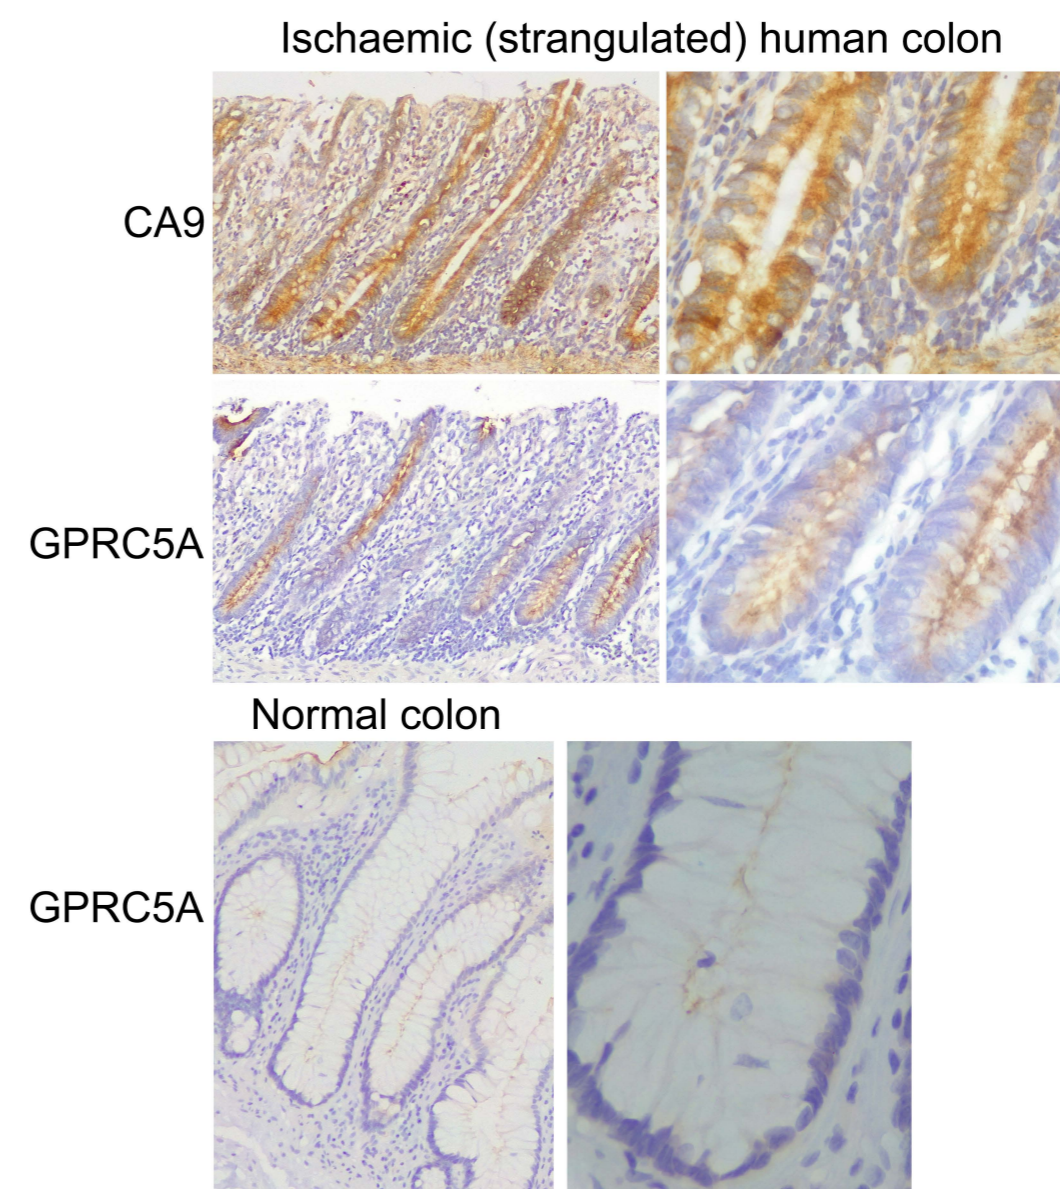

### Figure 2E

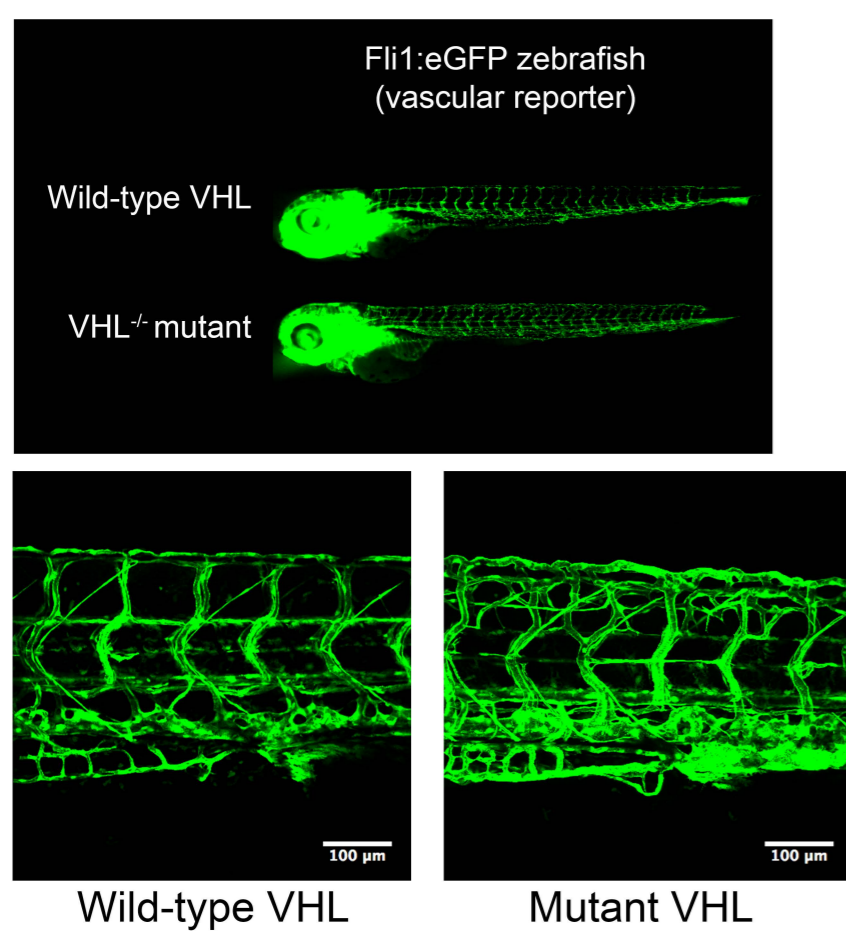

### Figure 2F

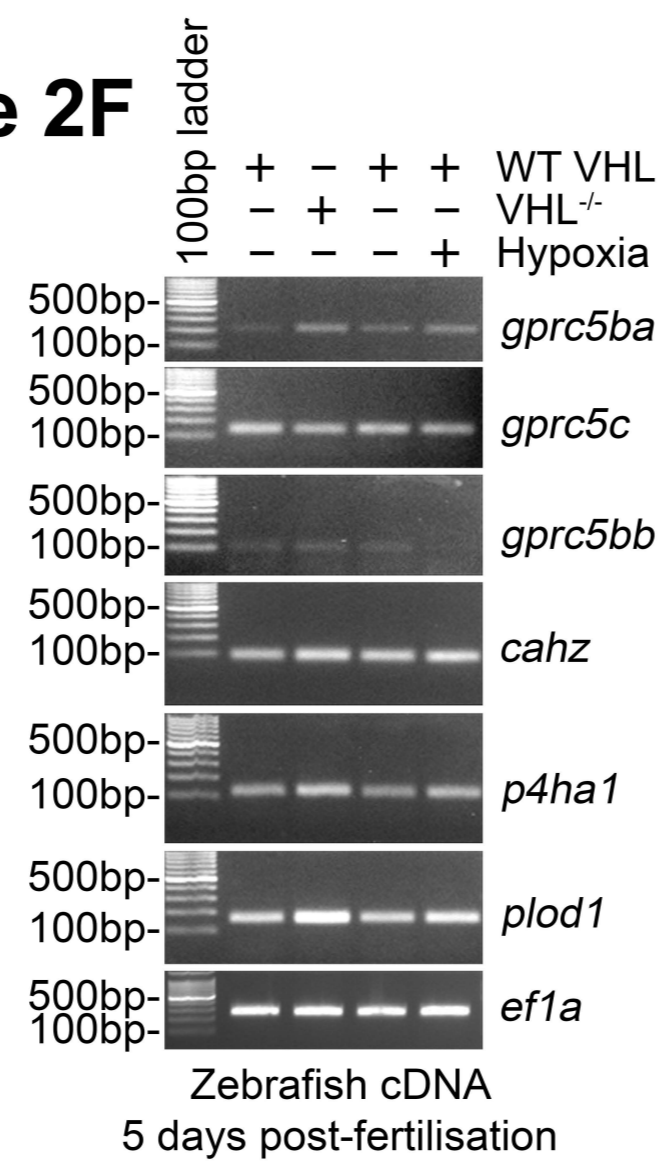

Supplement: EMMM-10-e8699-s004.pdf [file EMMM-10-e8699-s004.pdf]
