# Supplementary material for: Cancer cell adaptation to hypoxia involves a HIF‐GPRC5A‐YAP axis
Source: PubMed Central journal article supplement (PMC6220329; doi:10.15252/emmm.201708699), 2018-08-24

## Figure 3 source data

Unprocessed blots for the indicated figures are shown. Green boxes are used to indicate the exposure and/or area used in the paper where ambiguous.

### Figure 3A

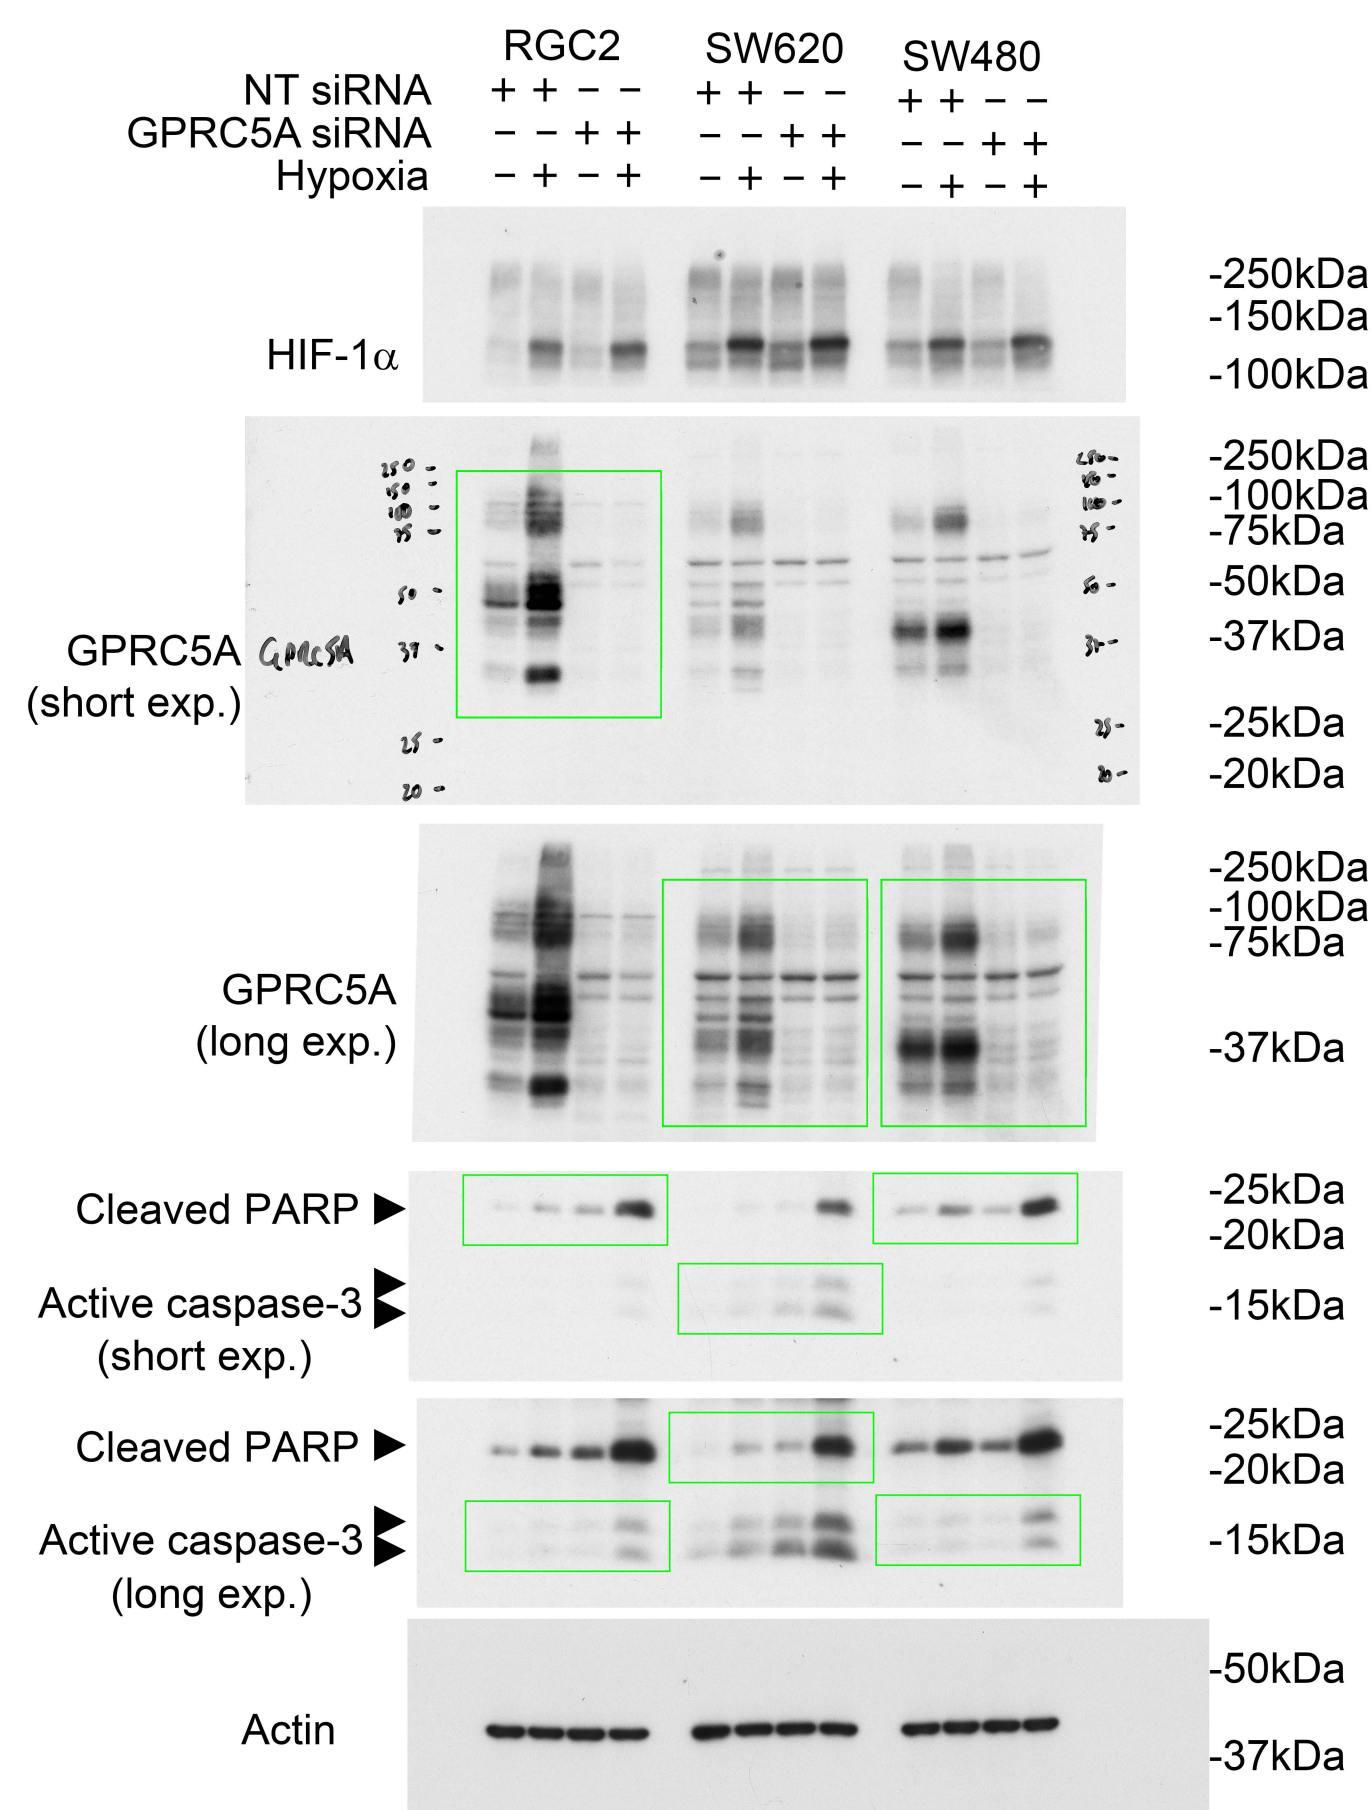

### Figure 3B

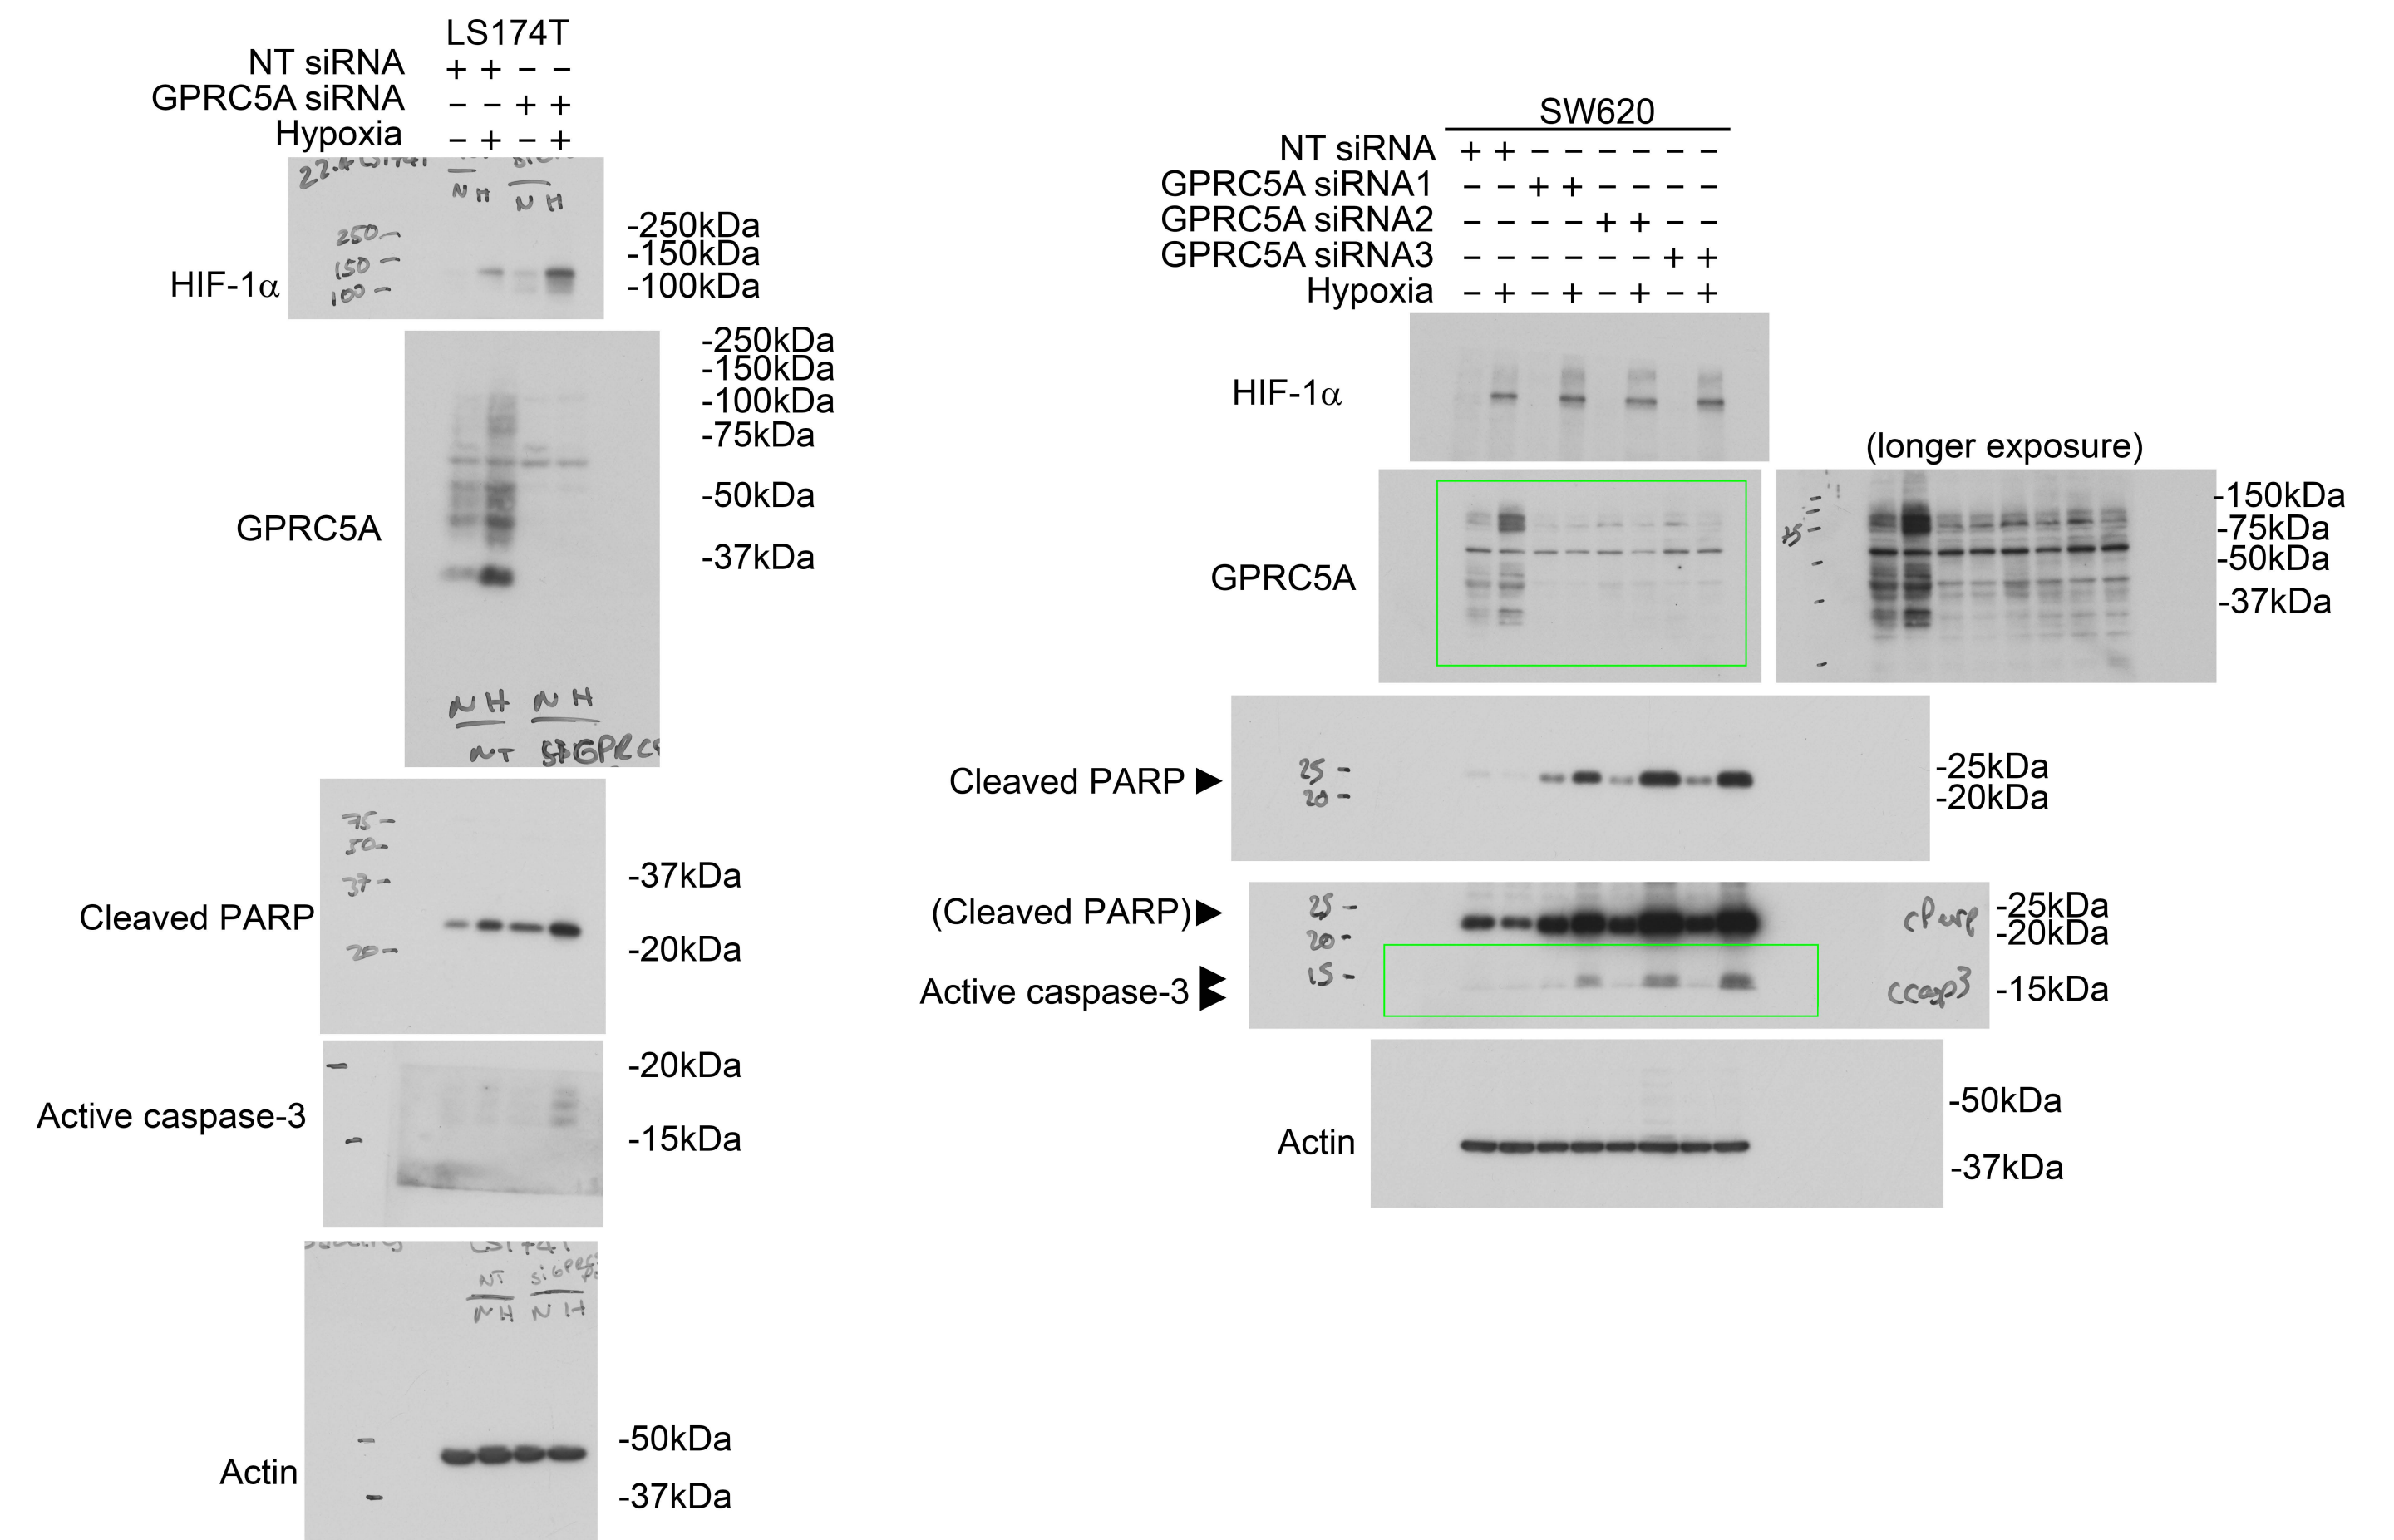

### Figure 3D

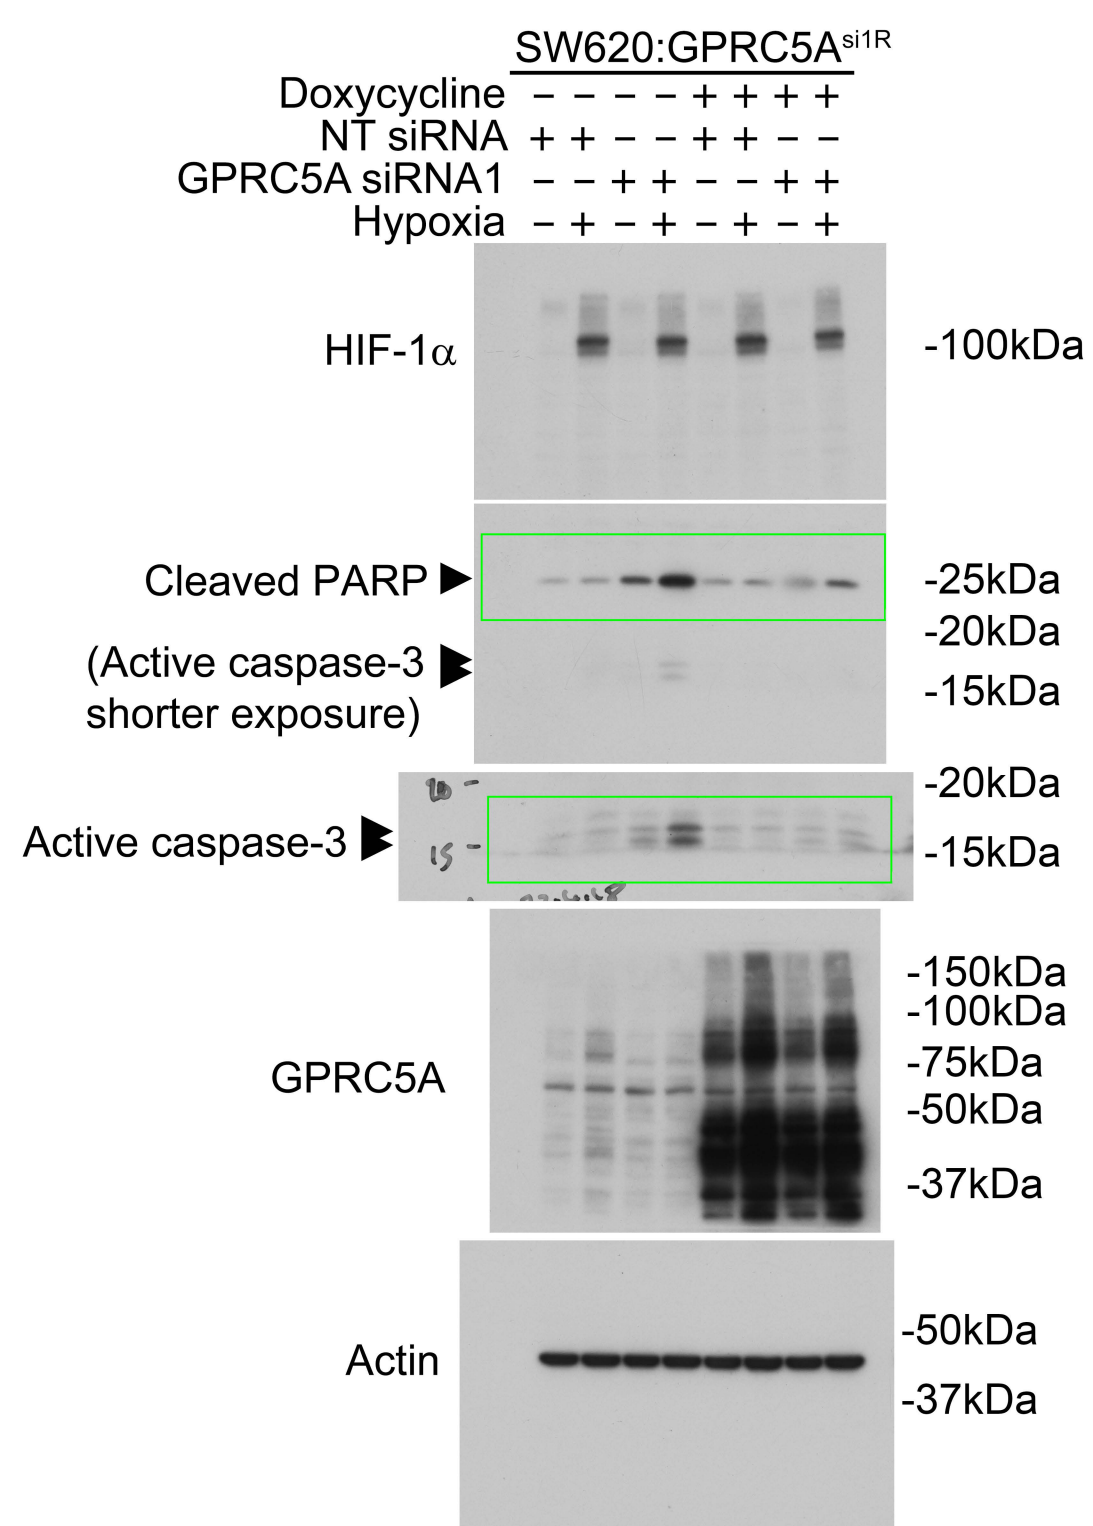

### Figure 3E

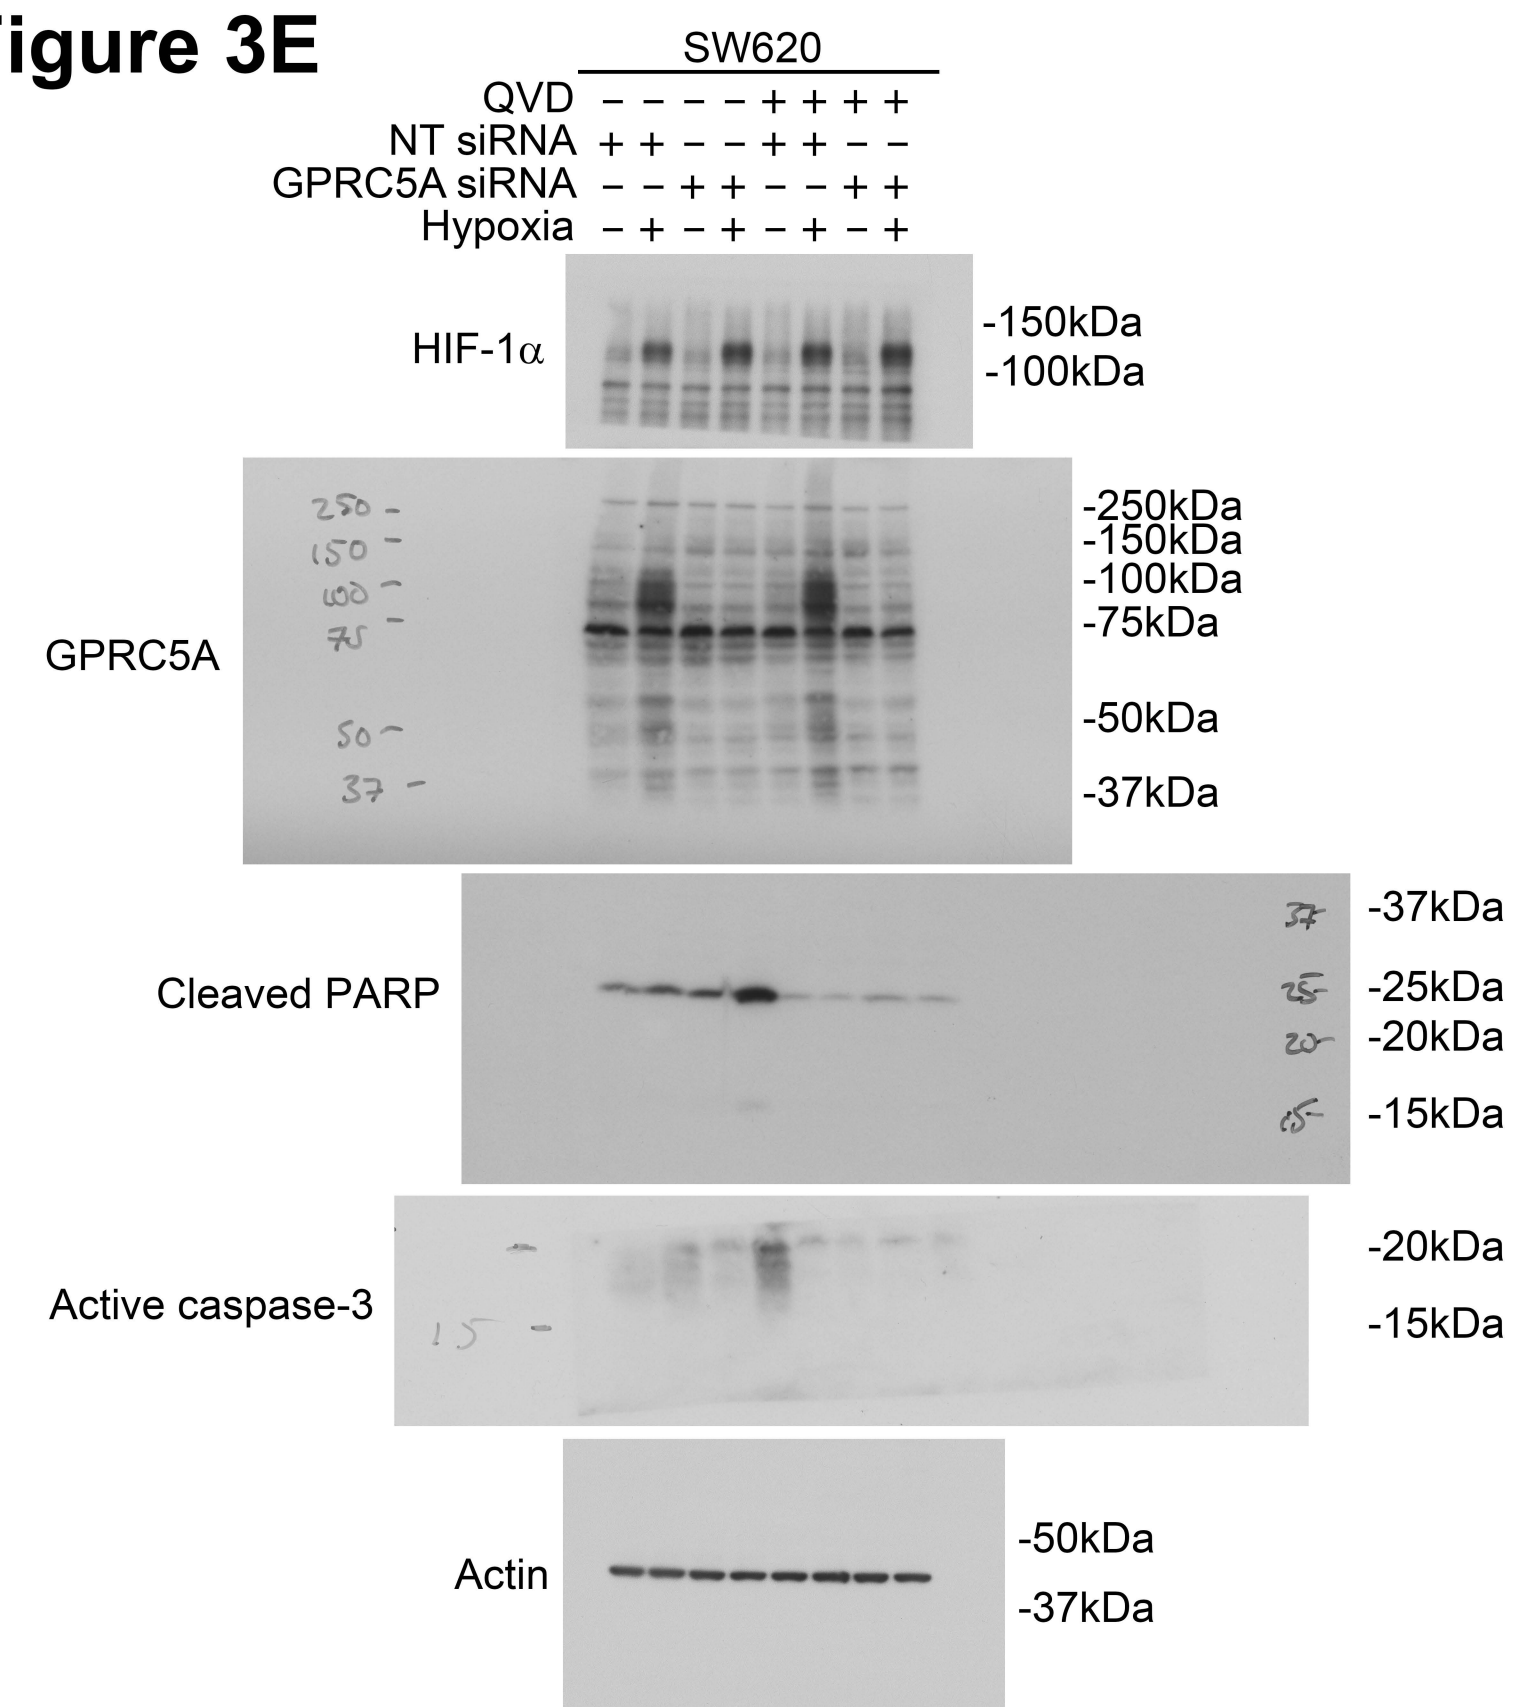

Supplement: EMMM-10-e8699-s005.pdf [file EMMM-10-e8699-s005.pdf]
